# Supplementary material for: Protective effects of macamides fromLepidium meyeniiWalp. against corticosterone-induced neurotoxicity in PC12 cells
Source: Royal Society of Chemistry journal article supplement (doi:10.1039/c9ra03268a), 2019-01-01
Supplement: c9ra03268a1.pdf [file c9ra03268a1.pdf]

### Supplementary material

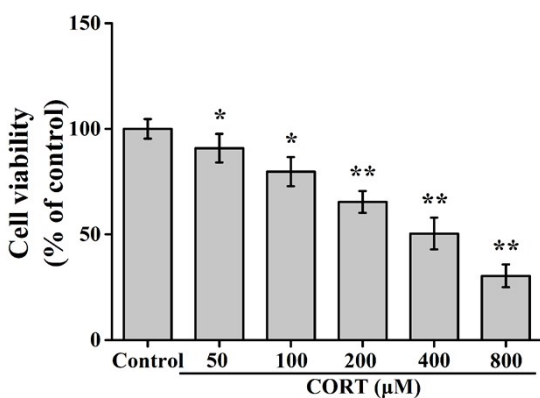

**Fig. S1** Effect of CORT (50–800 μM) alone on PC12 cells. Results are expressed as mean ± SEM of six independent experiments. \*P < 0.05 and \*\*P < 0.01 vs. control group.
